# Supplementary material for: Follicular Helper T (TFH) Cell Targeting by TLR8 Signaling For Improving HBsAg-Specific B Cell Response In Chronic Hepatitis B Patients
Source: PubMed Central journal article supplement (PMC8428528; doi:10.3389/fimmu.2021.735913), 2021-08-26

**Supplementary Table 1. Panels of flow cytometry antibodies**

| <b>Panels</b>         | <b>Sl. No.</b> | <b>Fluorochrome</b> | <b>Markers</b> | <b>Clone</b> | <b>Company</b> | <b>Cat. #</b> |
|-----------------------|----------------|---------------------|----------------|--------------|----------------|---------------|
| <b>T<sub>FH</sub></b> | 1              | BV421               | PD-1 (CD279)   | EH12.2H7     | Biolegend      | 329920        |
|                       | 2              | BV510               | ICOS           | C398.4A      | Biolegend      | 313525        |
|                       | 3              | BV570               | CD4            | RPA-T4       | Biolegend      | 317445        |
|                       | 4              | BV605               | CXCR5          | J252D4       | Biolegend      | 356930        |
|                       | 5              | BV711               | CD25           | M-A251       | Biolegend      | 356137        |
|                       | 6              | BV785               | CCR6           | G034E3       | Biolegend      | 353421        |
|                       | 7              | FITC                | CD69           | FN50         | Biolegend      | 310904        |
|                       | 8              | PE                  | BCL6           | K112-91      | BD Pharmigen   | 561522        |
|                       | 9              | PE-Dazzle 594       | CD3            | UCHT1        | Biolegend      | 300450        |
|                       | 10             | PE-Cy5              | CD40L          | 24-31        | Biolegend      | 310808        |
|                       | 11             | PerCP-Cy5.5         | OX40/CD134     | Ber-ACT35    | Biolegend      | 350009        |
|                       | 12             | PE-Cy7              | CXCR3          | G025H7       | Biolegend      | 353719        |
|                       | 13             | eFluor 660          | IL-21          | eBio3A3-N2   | Invirogen      | 50-7219-42    |
|                       | 14             | AF700               | CD8            | HIT8a        | Biolegend      | 300919        |
|                       | 15             | APC-Cy7             | Zombie NIR     | -----        | Biolegend      | 423105        |
| <b>B cells</b>        | 1              | BV570               | IgM            | MHM-88       | Biolegend      | 314516        |
|                       | 2              | BV785               | CD27           | O323         | Biolegend      | 302831        |
|                       | 3              | PE                  | CD19           | SJ25C1       | Biolegend      | 363003        |
|                       | 4              | PerCP-Cy5.5         | CD38           | HB-7         | Biolegend      | 356613        |
|                       | 5              | PE-Cy7              | CD21           | Bu32         | Biolegend      | 354911        |
|                       | 6              | APC                 | IgG            | M1310G05     | Biolegend      | 410711        |
|                       | 7              | AF700               | CD138          | MI15         | Biolegend      | 356511        |
|                       | 8              | APC-Cy7             | Zombie NIR     | -----        | Biolegend      | 423104        |

|                  |    |               |                      |           |             |                  |
|------------------|----|---------------|----------------------|-----------|-------------|------------------|
| <b>AIM assay</b> | 1  | BV421         | CD45RA               | HI100     | Biolegend   | 304129           |
|                  | 2  | BV510         | PD-1 (CD279)         | EH12.2H7  | Biolegend   | 329931           |
|                  | 3  | BV570         | CD4                  | RPA-T4    | Biolegend   | 317445           |
|                  | 4  | BV605         | CXCR5                | J252D4    | Biolegend   | 356930           |
|                  | 5  | BV711         | CD25                 | M-A251    | Biolegend   | 356137           |
|                  | 6  | FITC          | CD69                 | FN50      | Biolegend   | 310904           |
|                  | 7  | PE            | PD-L1 (CD274)        | 29E.2A3   | Biolegend   | 329705           |
|                  | 8  | PE-Dazzle 594 | CD3                  | UCHT1     | Biolegend   | 300450           |
|                  | 9  | PE-Cy5        | CD40L                | 24-31     | Biolegend   | 310808           |
|                  | 10 | PerCP-Cy5.5   | OX40/CD134           | Ber-ACT35 | Biolegend   | 350009           |
|                  | 11 | PE-Cy7        | CXCR3                | G025H7    | Biolegend   | 353719           |
|                  | 12 | AF700         | CD8                  | HIT8a     | Biolegend   | 300919           |
|                  | 13 | APC-Cy7       | Zombie NIR           | -----     | Biolegend   | 423105           |
|                  |    |               |                      |           |             |                  |
| <b>Cytokines</b> | 1  | BV421         | TGF- $\beta$ 1 (LAP) | TW4-2F8   | Biolegend   | 349613           |
|                  | 2  | BV510         | TNF- $\alpha$        | MAb11     | Biolegend   | 502949           |
|                  | 3  | BV570         | HLA-DR               | L243      | Biolegend   | 307637           |
|                  | 4  | BV785         | CD14                 | 63D3      | Biolegend   | 367141           |
|                  | 5  | FITC          | IL-1 $\beta$         | JK1B-1    | Biolegend   | 508206           |
|                  | 6  | PE            | IL-23p19             | 727753    | Invitrogen  | MA5-23644        |
|                  | 7  | PE-Dazzle 594 | IL-6                 | MQ2-13A5  | Biolegend   | 501121           |
|                  | 8  | PerCP-Cy5.5   | IL-12p40             | C11.5     | Biolegend   | 501821           |
|                  | 9  | PE-Cy7        | IL-27p28             | MM27-7B1  | Biolegend   | 516910           |
|                  | 10 | APC           | TLR8 (CD288)         | S16018A   | Biolegend   | 395506           |
|                  | 11 | AF700         | IL-18                | 74801     | R&D Systems | IC646N-<br>100UG |
|                  | 12 | APC-Cy7       | Zombie NIR           | -----     | Biolegend   | 423105           |

## Supplementary Legends

**Supplementary Figure 1. *In vitro* TLR8 stimulation augments proinflammatory cytokines in monocytes.** Representative flow plots show (A) sequential gating strategy for detecting cytokine positive monocytes. The bar graphs indicate (B) frequencies of CD14<sup>+</sup>HLA-DR<sup>+</sup> monocytes in response to various treatments, (C) TLR8 expression in response to various treatments and frequencies of CD14<sup>+</sup>HLA-DR<sup>+</sup> monocytes producing (D) TGF-β1 and (E) IL-27p28. Error bar on the graph represents the standard error of mean calculated from 6 individual CHB patient PBMCs. Differences between stimulations were calculated by one-way analysis of variance (ANOVA) or Kruskal-Wallis test for multiple comparisons. P values of ≤0.05\* was considered statistically significant.

**Supplementary Figure 2. TLR8-specific agonism upregulated HBV-specific GC-like T<sub>FH</sub> development factors and their subsets.** Flow cytometry plots show (A) gating strategy for T<sub>FH</sub> panel and (B) CXCR3/CCR6 cT<sub>FH</sub> subsets compared between untreated (UT/control), TLR8 stimulations ssRNA40, TL8-506, PMA/Ion, ssRNA40 stim and TL8-506 stim. “Stim” means subtraction of PMA/Ion from the respective values of TLR8 + PMA/Ion re-stimulations. Frequencies of circulating follicular helper T (cT<sub>FH</sub>) cells and their subsets are shown in (C) CXCR5<sup>+</sup>CD4<sup>+</sup> cT<sub>FH</sub> cells gated on CD3<sup>+</sup> T lymphocytes, (D) cT<sub>FH</sub>1 (CXCR3<sup>+</sup>CCR6<sup>-</sup>), (E) cT<sub>FH</sub>2 (CXCR3<sup>-</sup>CCR6<sup>-</sup>), (F) cT<sub>FH</sub>17 (CXCR3<sup>-</sup>CCR6<sup>+</sup>) and (G) cT<sub>FH</sub>1/17 (CXCR3<sup>+</sup>CCR6<sup>+</sup>) gated on CXCR5<sup>+</sup>CD4<sup>+</sup> cT<sub>FH</sub> cells. Each symbol in the graph shows 6 individual donors and horizontal bar in the graph represents median range values. Numbers presented inside the box indicate percentages. Square quadrants diagram illustrate circulating T<sub>FH</sub> subsets. The differences

between stimulations were evaluated by one-way ANOVA or Kruskal-Wallis test for multiple comparisons. P values of  $\leq 0.05^*$ ,  $0.01^{**}$ ,  $0.001^{***}$  indicate significance.

**Supplementary Figure 3. Selgantolimod treatment enhanced  $T_{FH}$  differentiation factors in CHB clinical samples.** Selective-TLR8 agonist Selgantolimod was orally administered to patients infected with CHB and PBMCs (n=8-10) were tested from baseline (BL, pre) and TLR8 (8h post-Selgantolimod). PBMCs were left untreated (UT) or treated with combination of HBsAg/HBV Pep for 5 days followed by re-stimulation with PMA/Ion. **(A-F, H)** represents flow plots and frequencies of co-expression of  $IL-21^+BCL-6^+$ ,  $ICOS^+BCL-6^+$ ,  $ICOS^+CD40L^+$  and  $PD-1^+CXCR3^-$  cells, gated on  $CXCR5^+CD4^+$   $cT_{FH}$  cells **(G)** upregulated with TLR8 agonist (8h post-single oral dose). Numbers inside boxes indicate percentage of double positive cells. A two-tailed paired, non-parametric or the Wilcoxon signed-rank Student's t test were conducted to evaluate the differences between BL and 8h post-TLR8 treated samples. P values of  $\leq 0.05^*$  indicates statistical significance. CHB, chronic hepatitis B; HBV Pep, HBsAg/HBV peptides pool; PMA, phorbol-12-myristat-13-acetate; Ion, ionomycin; ns, no significance.

**Supplementary Figure 4. Selgantolimod rescued the defective HBV-specific activation induced markers (AIM) of GC-like  $T_{FH}$  cells in Phase 1B clinical subjects.** FACS analysis was performed using AIM assay panel antibodies (Supplementary Table 1). Flow plot represents **(A)** gating strategy for AIM assay panel. Frequencies of **(B)**  $cT_{FH}$  cells ( $CXCR5^+CD4^+$  gated on  $CD3^+$  T lymphocytes) and **(C)** GC-like  $T_{FH}$  ( $PD-1^+CXCR3^-$  cells gated on  $CXCR5^+CD4^+$   $cT_{FH}$  cells) cells are compared between HBV vaccinated HC, BL and TLR8 (8h post-Selgantolimod) after *in vitro* stimulations with HBV pep or SEB. Each symbol in the graph shows individual

donor and horizontal bar in the graph represents median range values. A two-tailed unpaired or paired, non-parametric or the Wilcoxon signed-rank Student's t tests were conducted. P values of  $\leq 0.05^*$ ,  $0.01^{**}$ ,  $0.001^{***}$  indicate significance.

**Supplementary Figure 5. TLR8 signaling increased memory B, plasma B and modulated B cell subsets.** Flow plots indicating (A) sequential gating strategy of B cell panel and (B) CD19<sup>+</sup> B lymphocytes. Frequencies of (C) B cells (CD19<sup>+</sup>) (D) PCs (CD19<sup>-</sup>CD138<sup>+</sup>) and (E) PBs (CD38<sup>+</sup>CD138<sup>-</sup> cells gated on CD19<sup>+</sup>CD27<sup>++</sup> B lymphocytes) are shown. Dotted line distinguishes the data between TLR8 without or with HBV Pep treatments. Statistical significances were performed by two-tailed, non-parametric or the Wilcoxon signed-rank Student's t test for comparison between stimulations. P values of  $\leq 0.05^*$ ,  $0.01^{**}$  were statistically significance. ns, no significance; PCs, plasma cells; PBs, plasmablasts.

**Supplementary Figure 6. TLR8 signaling promotes IL-12 dependent GC-like T<sub>FH</sub> cell differentiation and improved IL-21 production.** Autologous naïve CD4<sup>+</sup> T cells were isolated from PBMCs of HC (n=2) and CHB patients (n=2) and co-cultured with CD14<sup>+</sup> enriched monocytes (as APCs, 2:1 ratio) previously stimulated with medium (UT, negative control), TLR8-specific ligands ssRNA40 or TL8-506 along with isotype control IgG, anti-IL-12 or anti-IL-18 neutralizing (blocking) Ab and cultured for 6 days in the presence of SEB followed by re-stimulation with PMA/Ion to activate T<sub>FH</sub> cells. Flow cytometry evaluation with T<sub>FH</sub> panel markers using manufacturer protocol as stated in Figure 2 shows (A) intracellular expression of IL-21, gated on (E) cT<sub>FH</sub> (CD3<sup>+</sup>CD4<sup>+</sup>CXCR5<sup>+</sup> T) cells. Co-expression of GC-like T<sub>FH</sub> differentiation markers (B) IL-21<sup>+</sup>ICOS<sup>+</sup> and (C) ICOS<sup>+</sup>PD-1<sup>+</sup> on CD3<sup>+</sup>CD4<sup>+</sup>CXCR5<sup>+</sup> T cells

(D). (F) Intracellular expression of IL-21 producing CXCR5<sup>+</sup> cells, generated from naïve CD4<sup>+</sup> T cells (without monocytes as APCs) cultured with medium (UT), rhIL-12 or rhIL-18 for 6 days followed by re-stimulation with PMA/Ion. Numbers inside the quadrants represents percentage of events. rhIL-12 and rhIL-18, recombinant human protein IL-12 and IL-18; Cont. IgG, isotype control IgG.

**Supplementary Figure 7.** Flow plots (A) represent the co-expression of IL-21<sup>+</sup>CXCR5<sup>+</sup>, IL-21<sup>+</sup>BCL-6<sup>+</sup> and ICOS<sup>+</sup>BCL-6<sup>+</sup> markers, gated on CXCR5<sup>+</sup>CD4<sup>+</sup> cT<sub>FH</sub> cells after stimulation of CpG-ODN (non-TLR8 agonist) and PMA/Ion for 5 days. Representative flow plots also show comparative co-expression of (B) OX40<sup>+</sup>CD25<sup>+</sup>, (C) PD-L1<sup>+</sup>CD25<sup>+</sup> and (D) CD69<sup>+</sup>CD40L<sup>+</sup> cells gated on CXCR5<sup>+</sup>CD4<sup>+</sup> T cells in HC and CHB (BL and TLR8) samples. Numbers shown inside the flow box indicate percentage of events.

**Supplementary Figure 8.** PBMCs from CHB patients (n=3) were left untreated (UT) or treated with TLR8 agonists ssRNA40 or TL8-506 for 5 days. ssRNA40 stim and TL8-506 stim indicates subtraction of overnight PMA/Ion stimulations from the respective values of TLR8 + PMA/Ion re-stimulations. Illustrative flow plots show (A) intracellular expression of IFN $\gamma$  and TNF $\alpha$ , gated on cT<sub>FH</sub> (CXCR5<sup>+</sup>CD4<sup>+</sup>CD3<sup>+</sup> T lymphocytes) cells. (B) Represents FMO controls on the expression of IL-21, ICOS and BCL-6 cells, gated on CXCR5<sup>+</sup>CD4<sup>+</sup> cT<sub>FH</sub> cells after 5 days culture of PBMCs from CHB patients (n=3) with ssRNA40 stim.

# Supplementary Figure 1

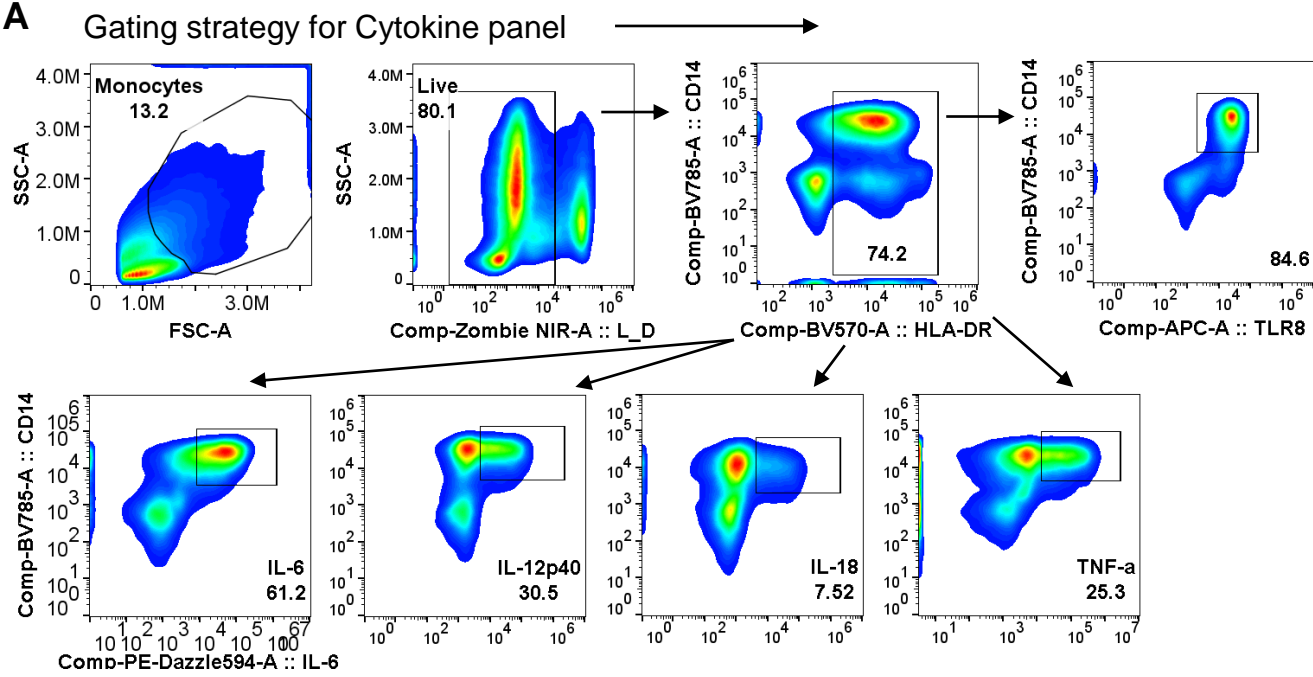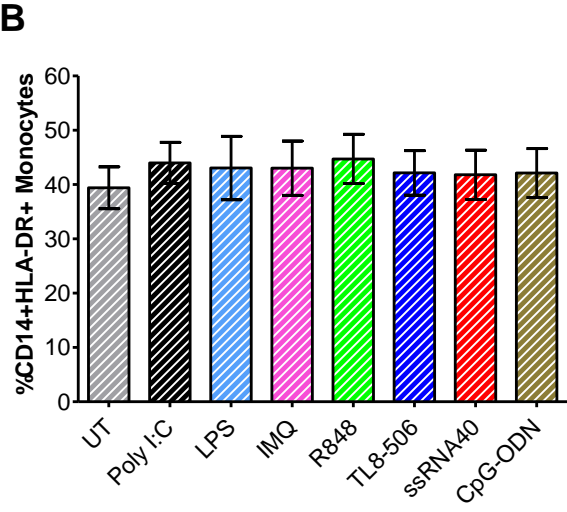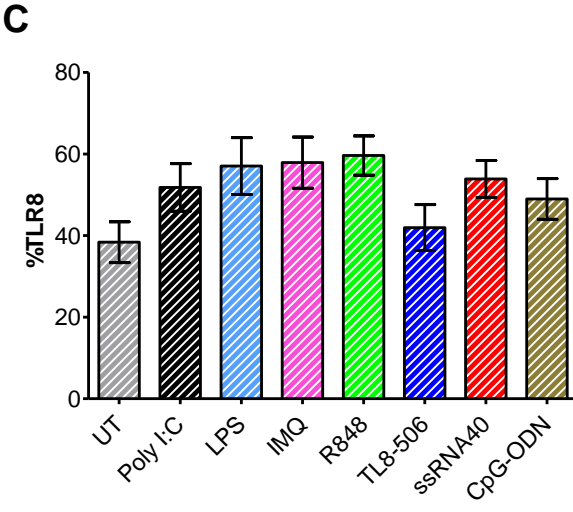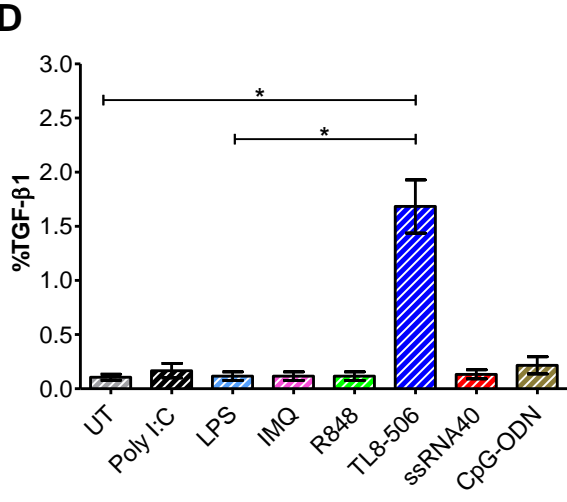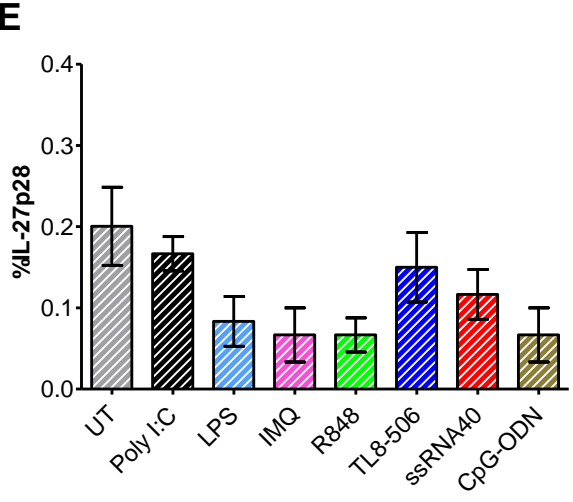

# Supplementary Figure 2

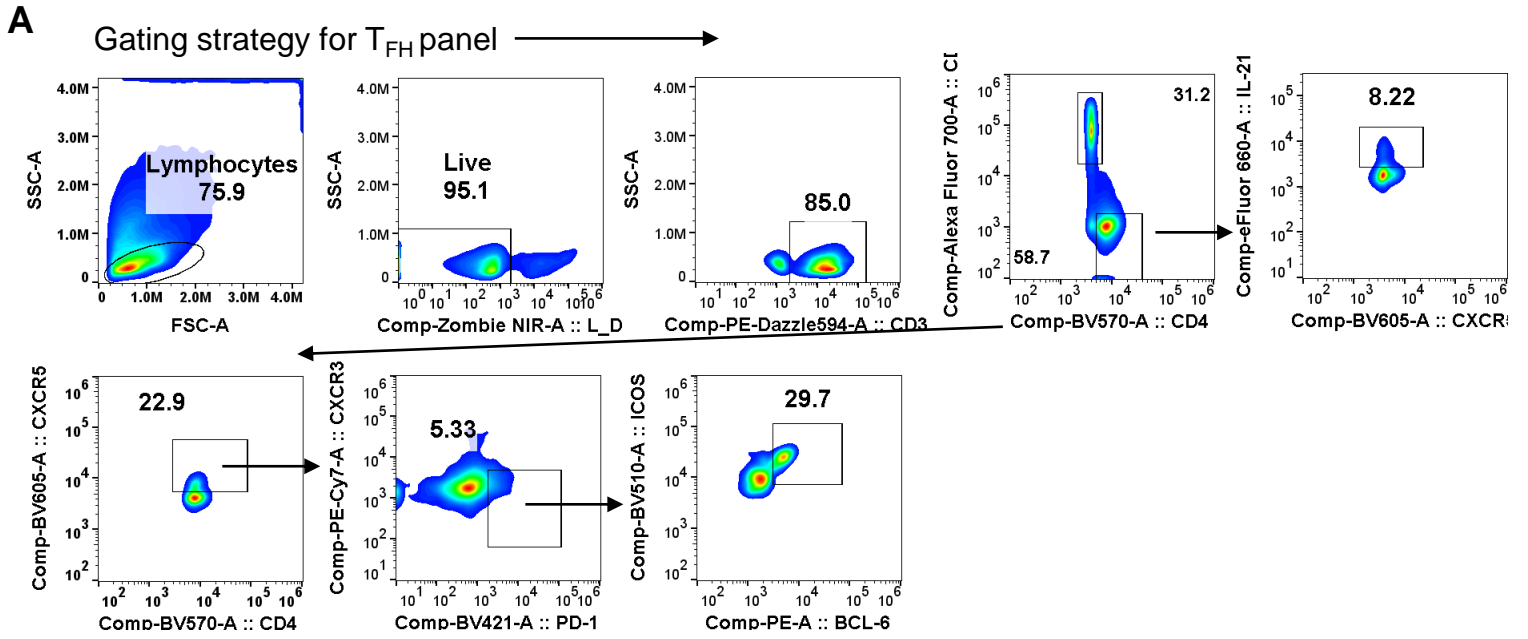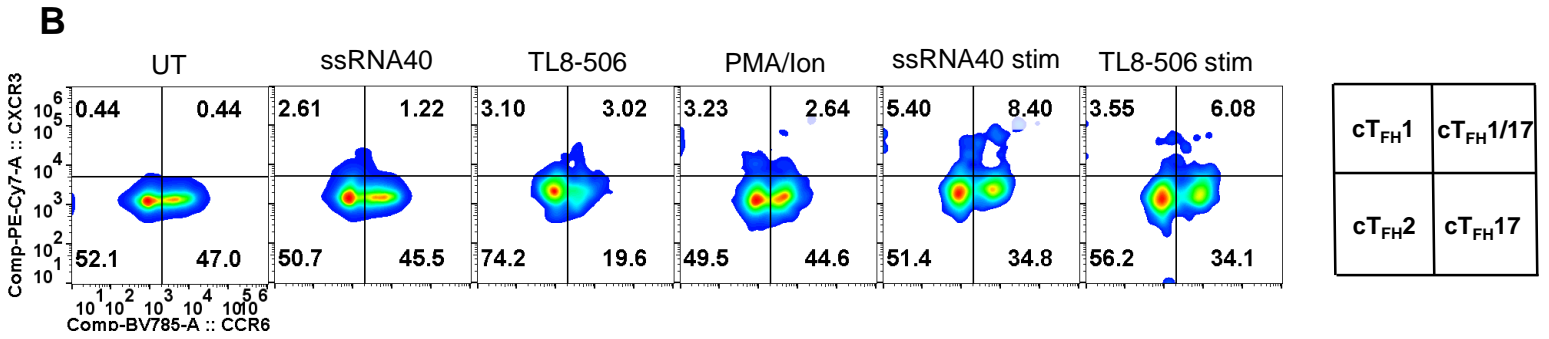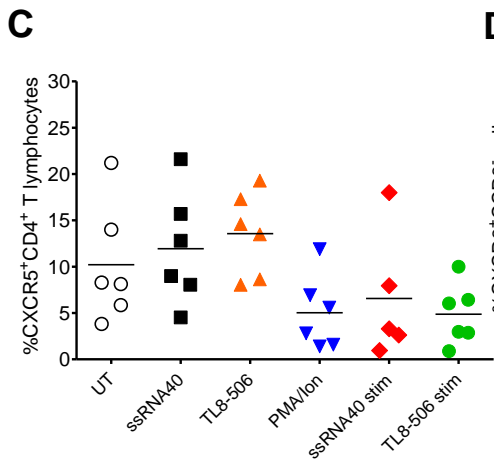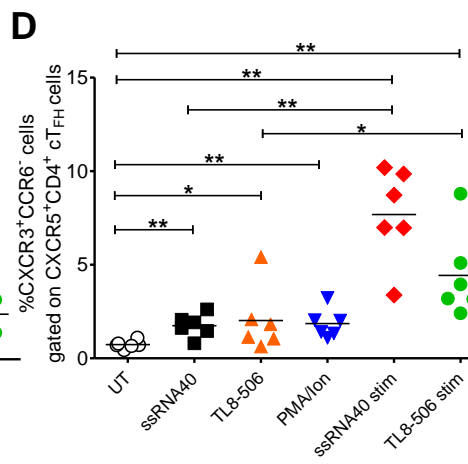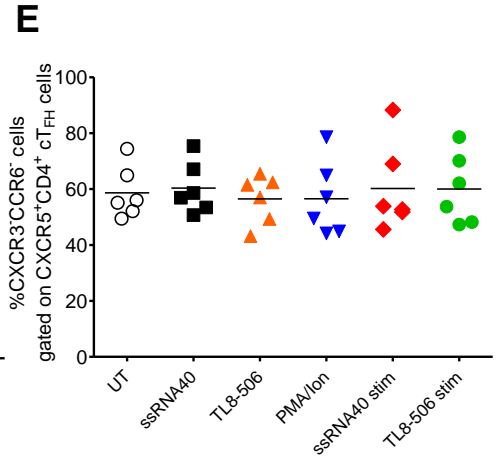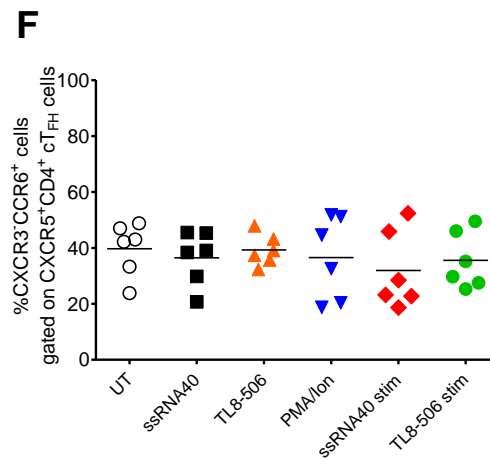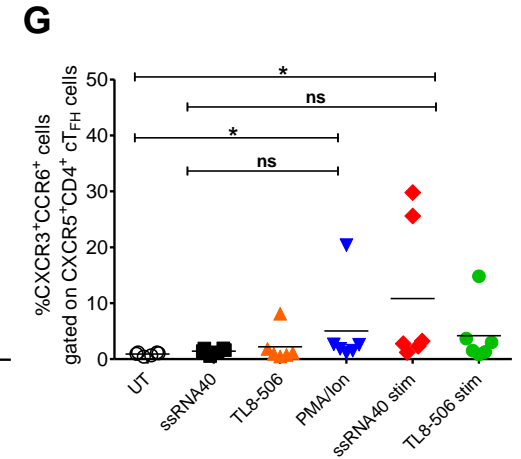



# Supplementary Figure 3

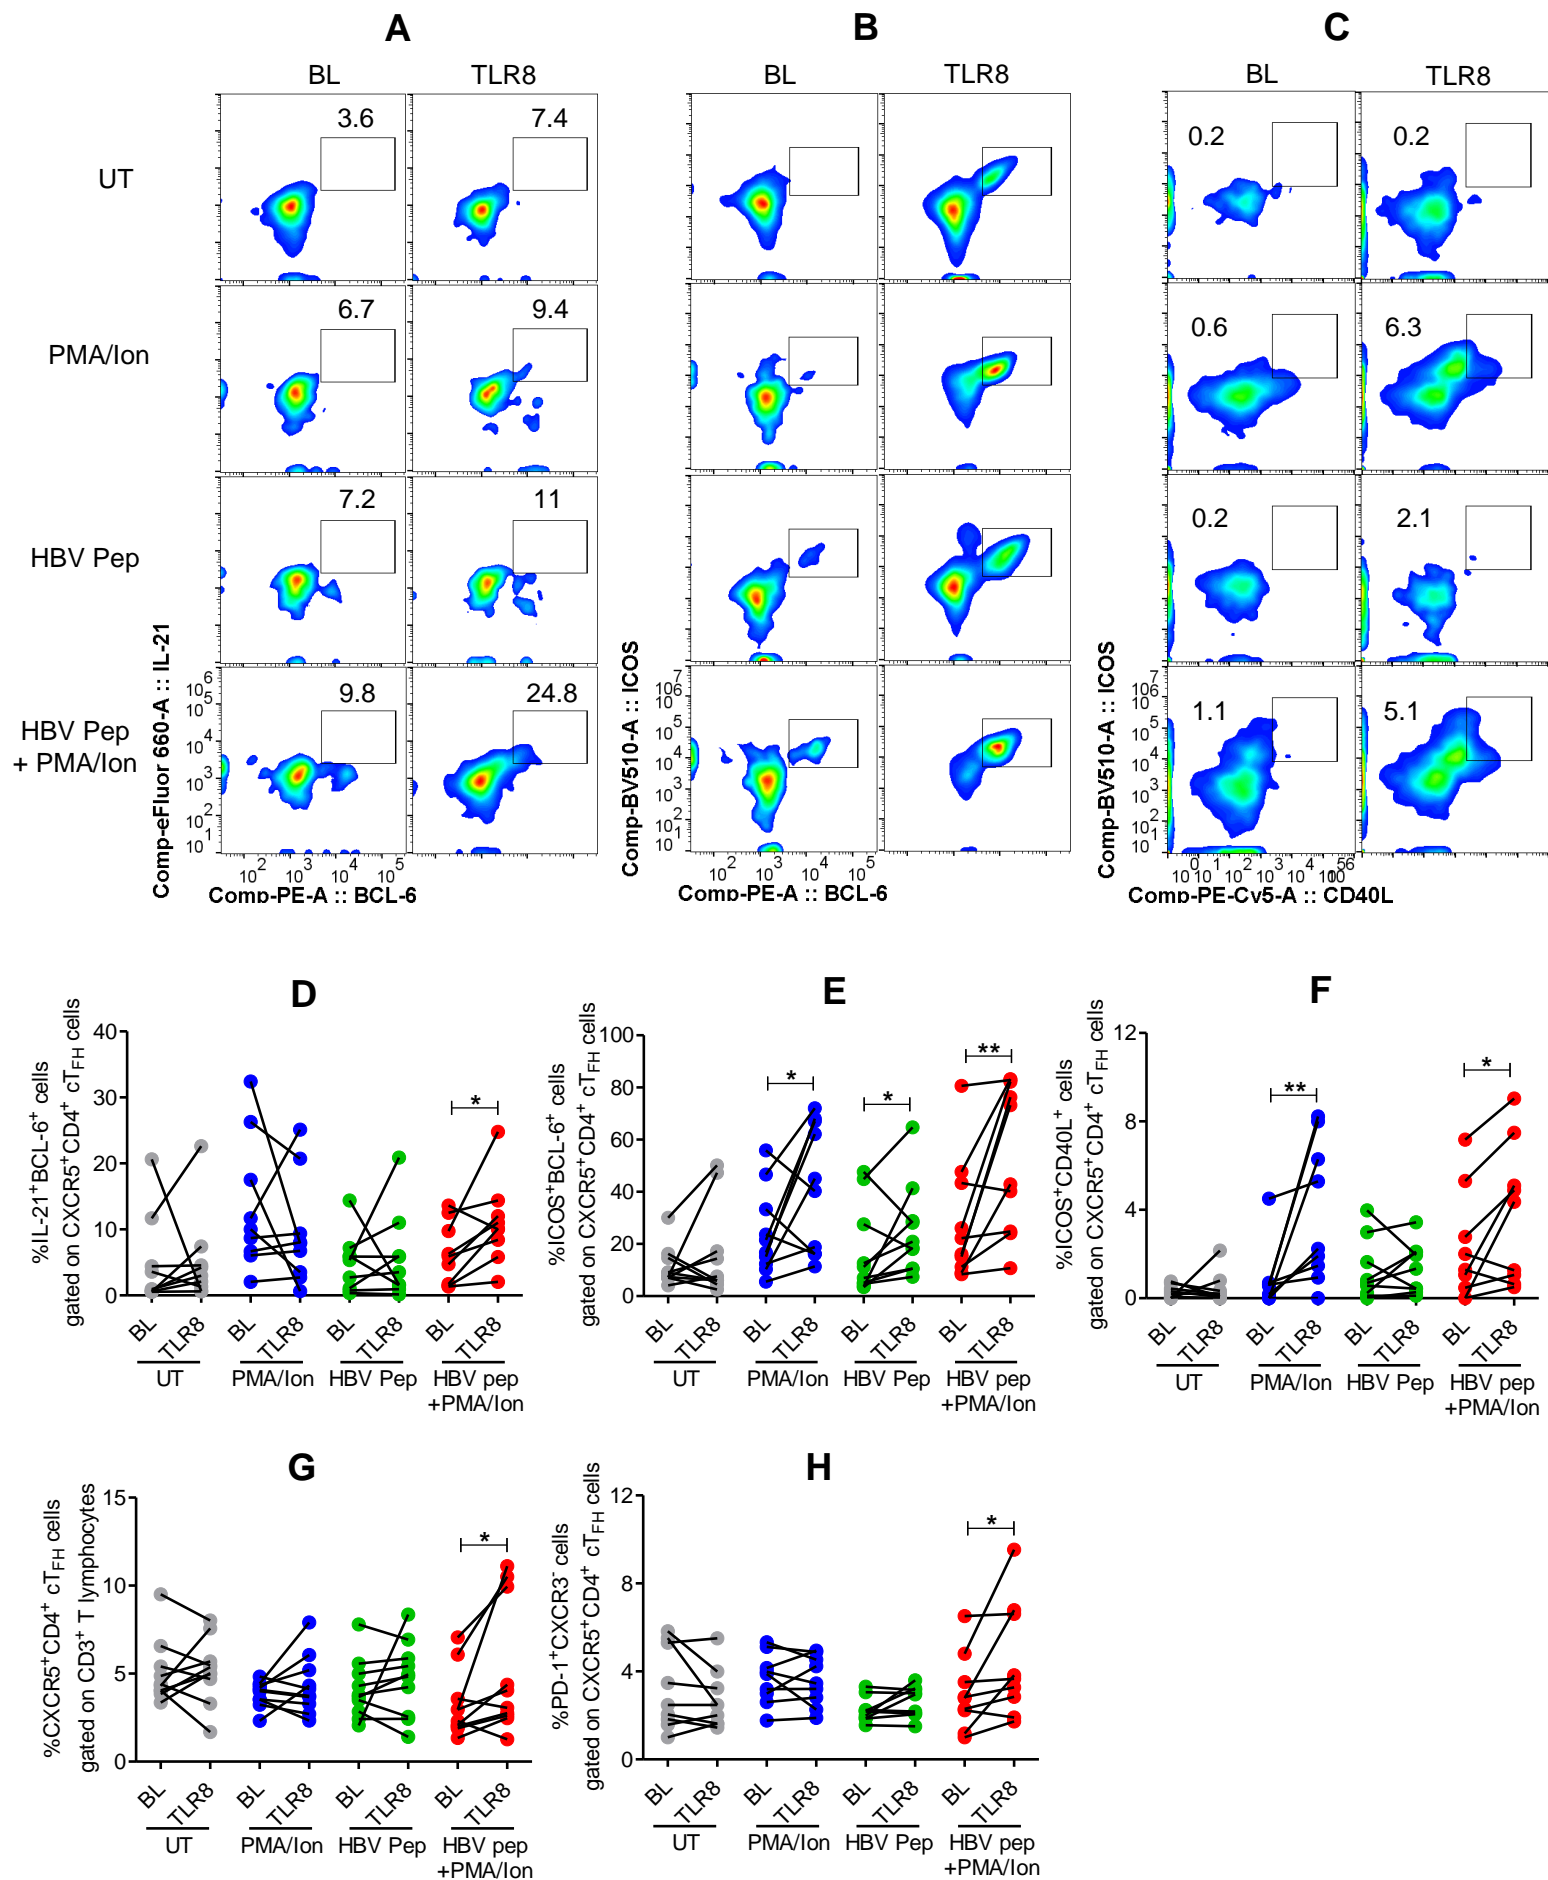

# Supplementary Figure 4

## A Gating strategy for AIM assay panel

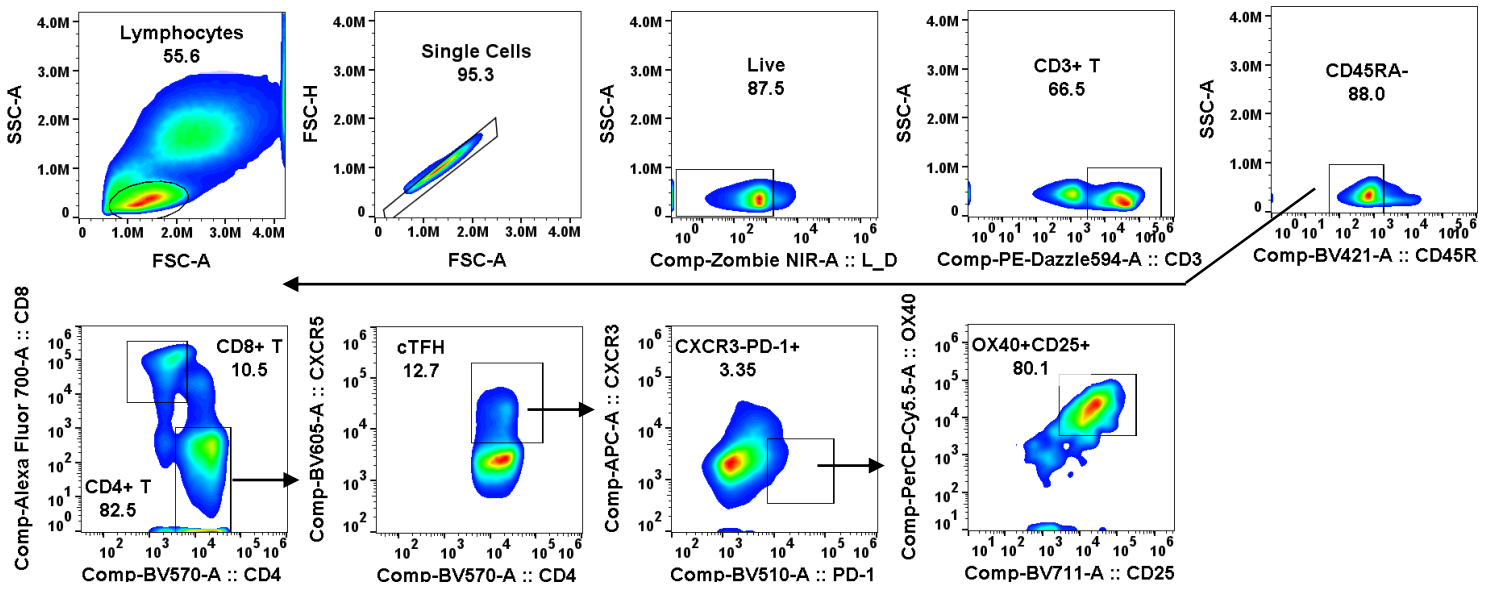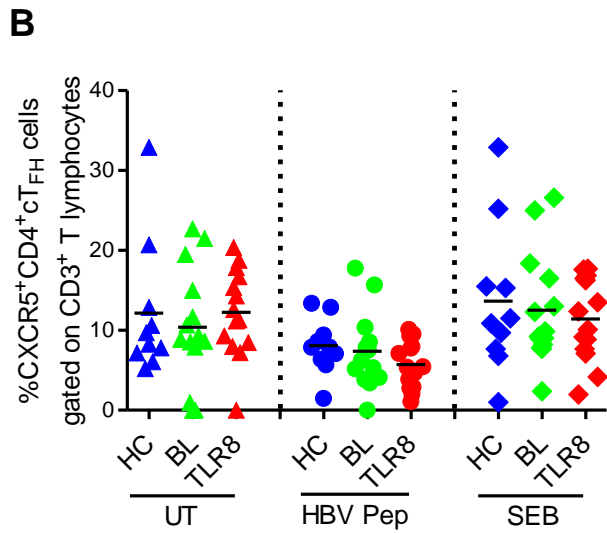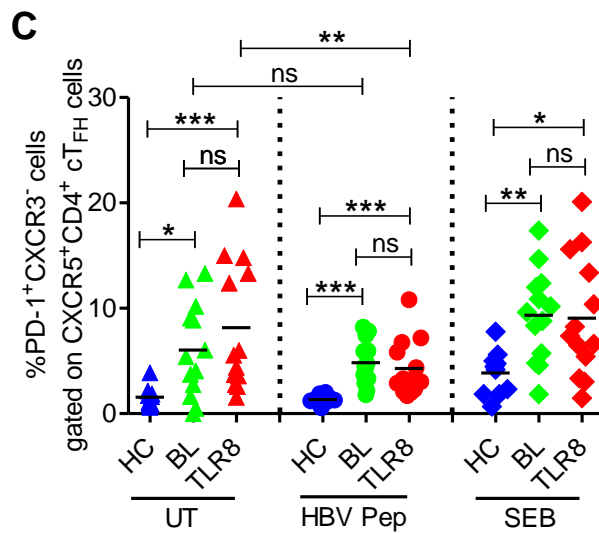

# Supplementary Figure 5

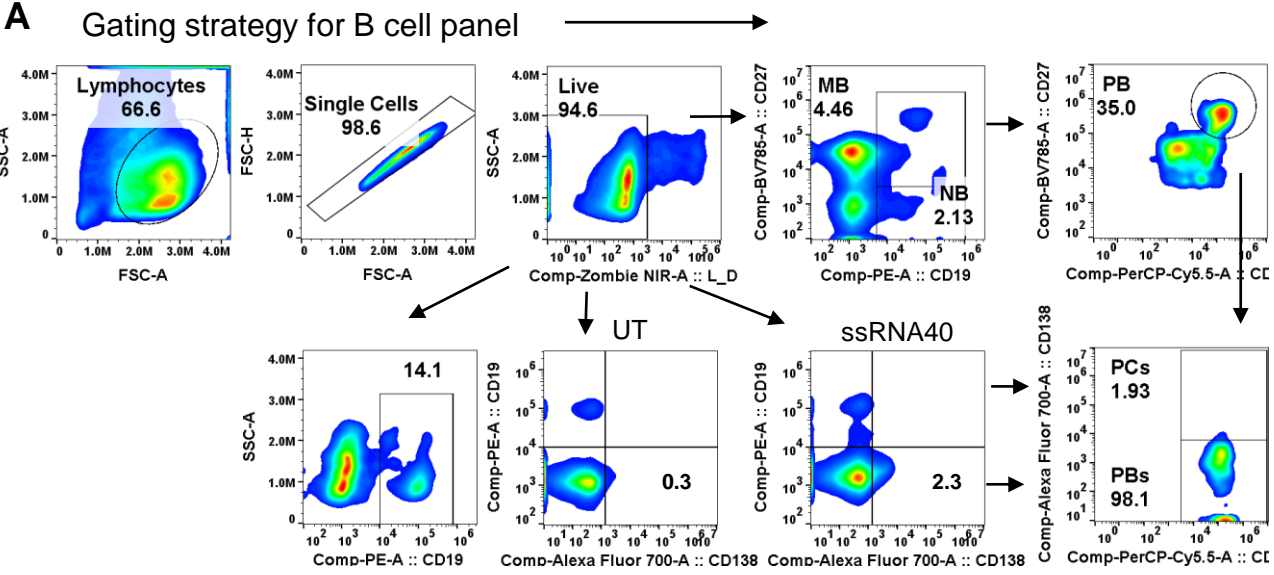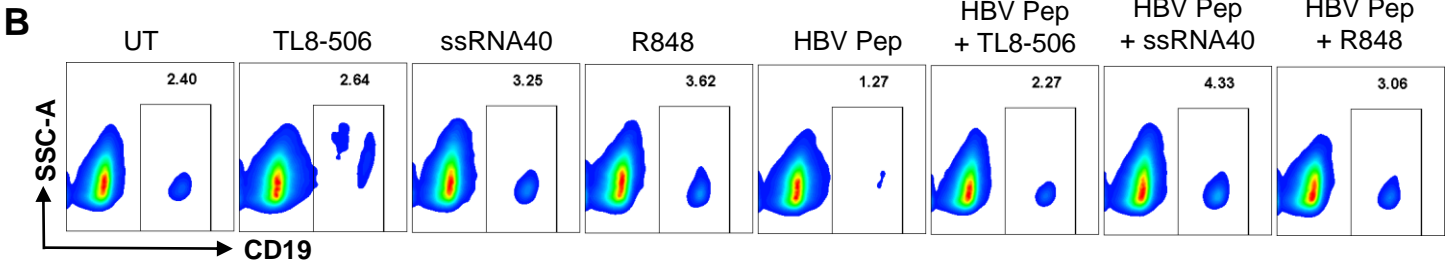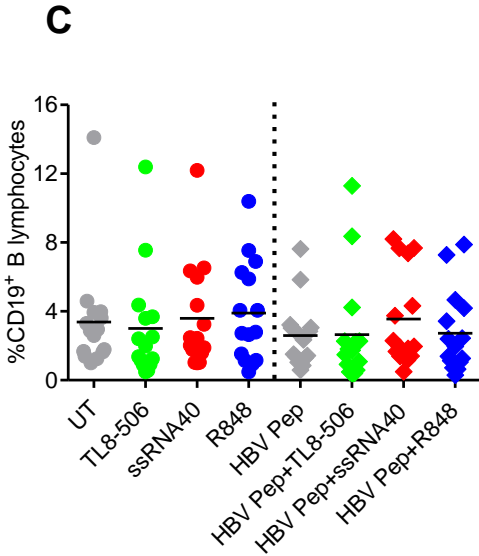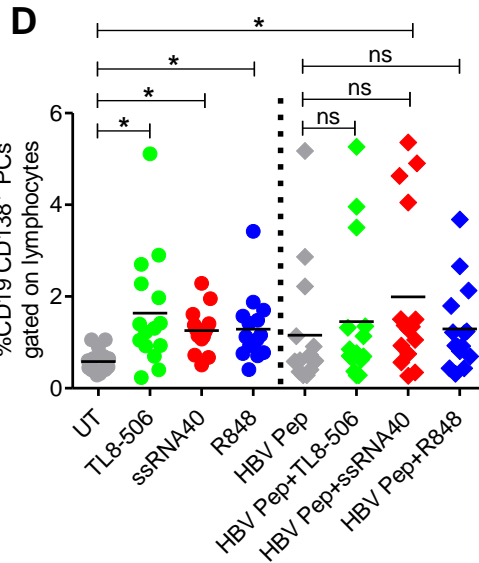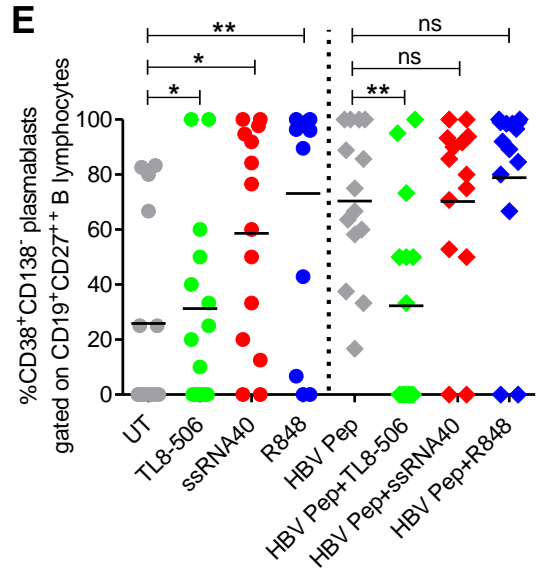

# Supplementary Figure 6

## CD14<sup>+</sup> Monocytes : Naïve CD4<sup>+</sup> T Co-culture

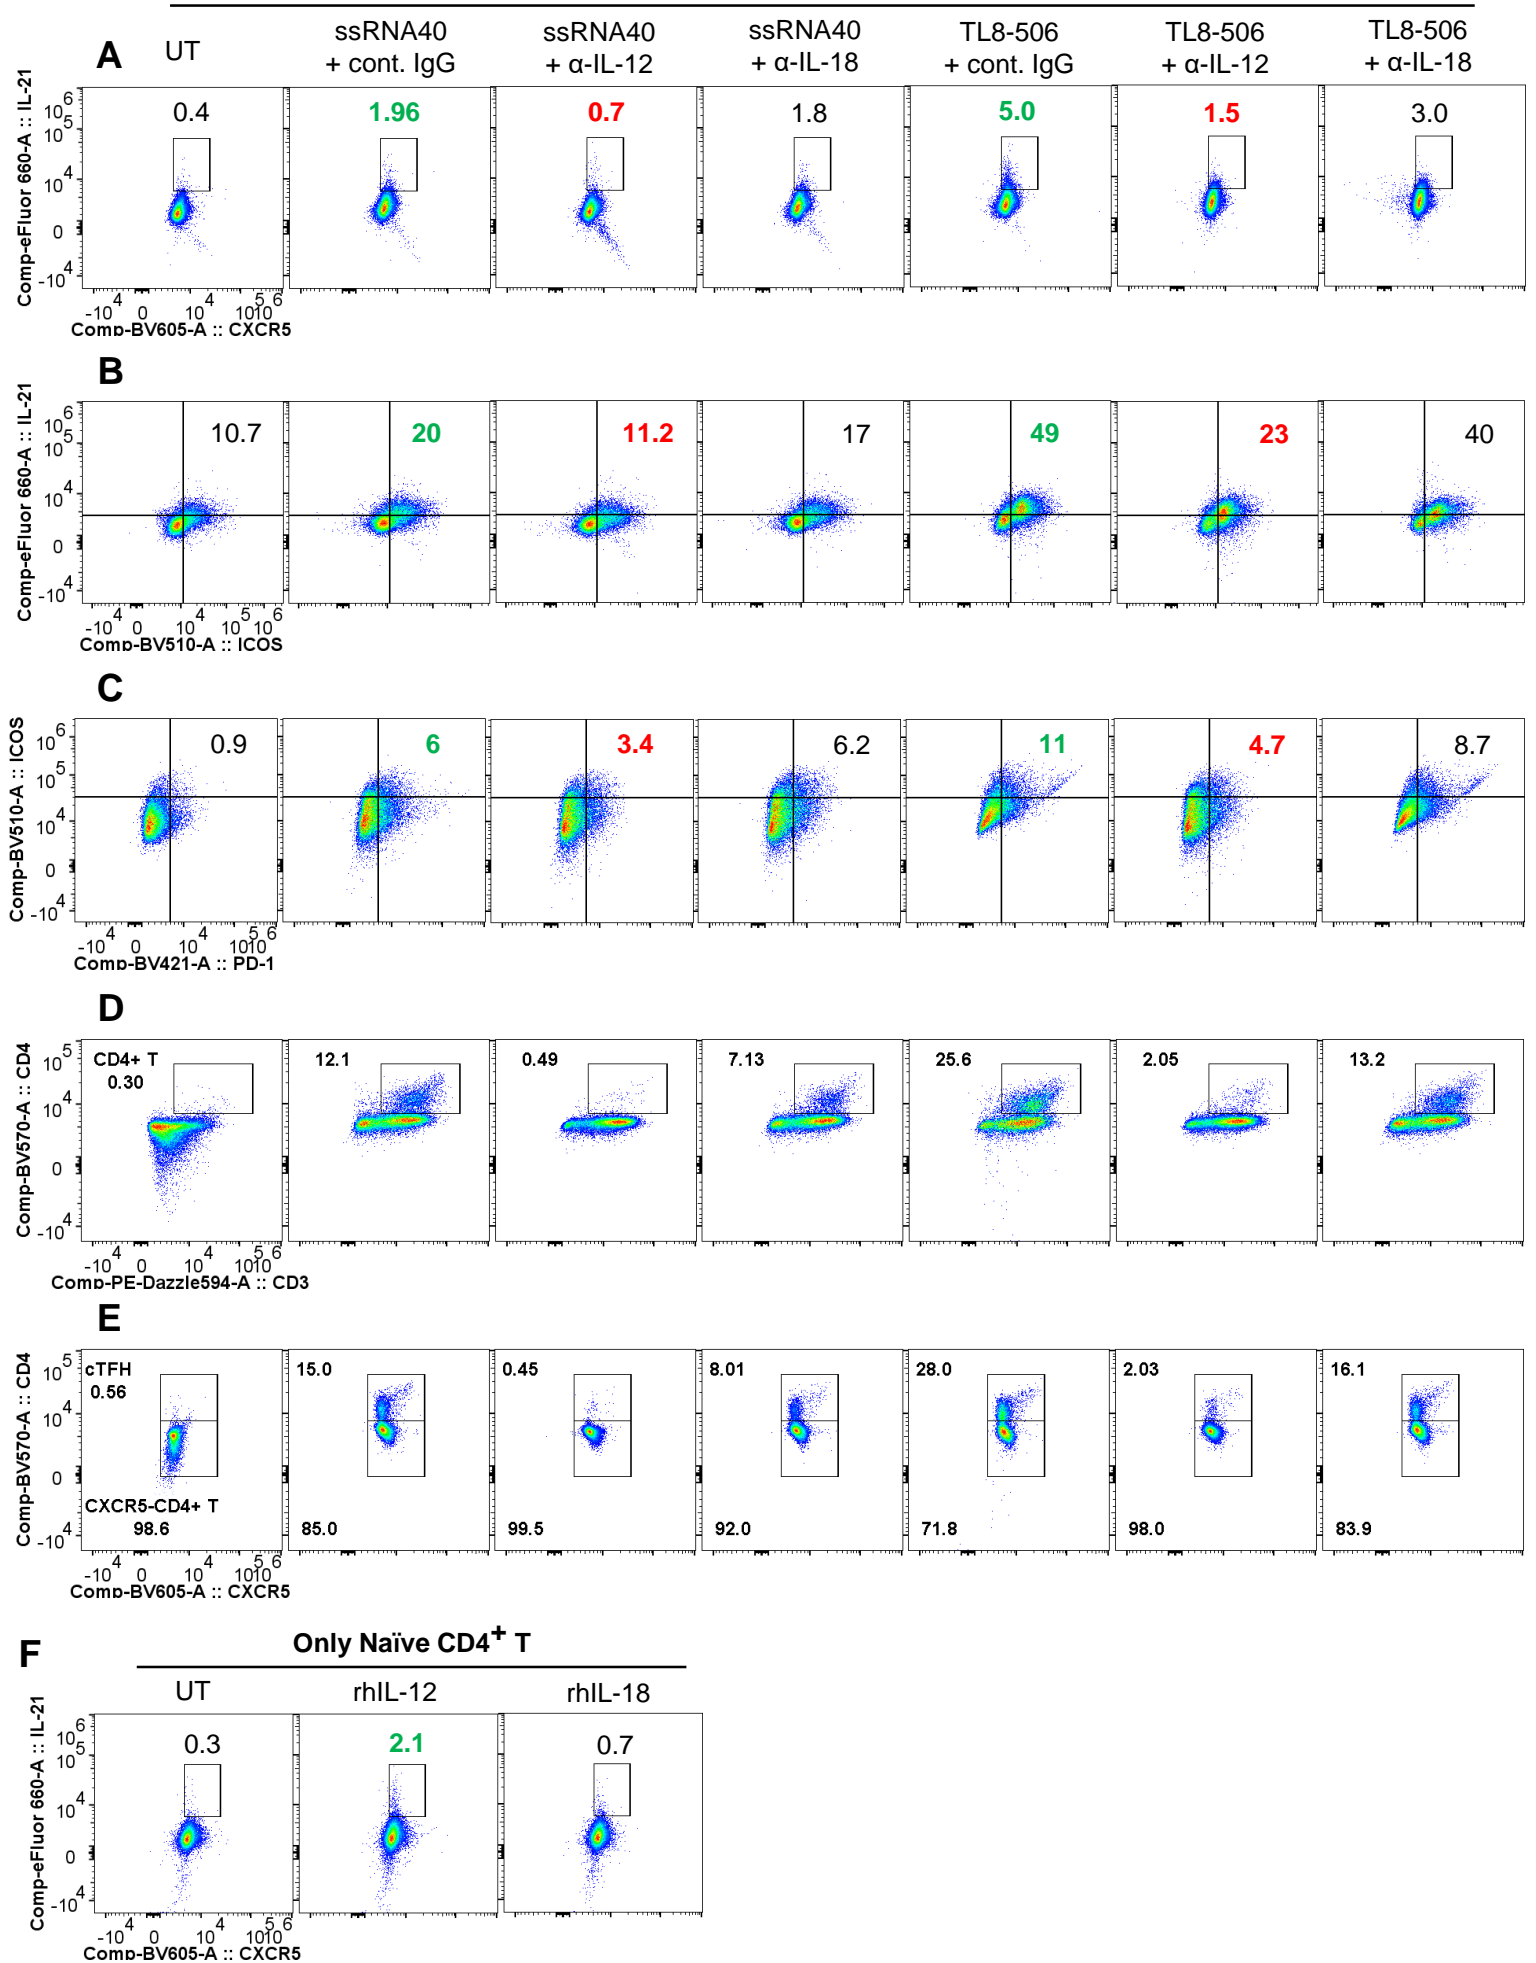

# Supplementary Figure 7

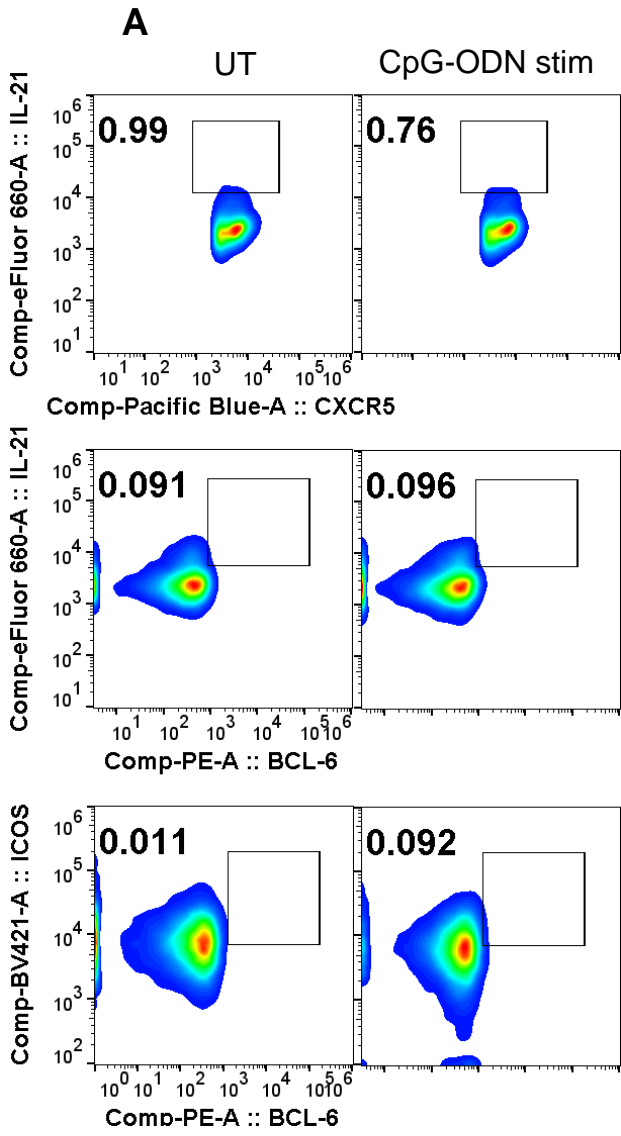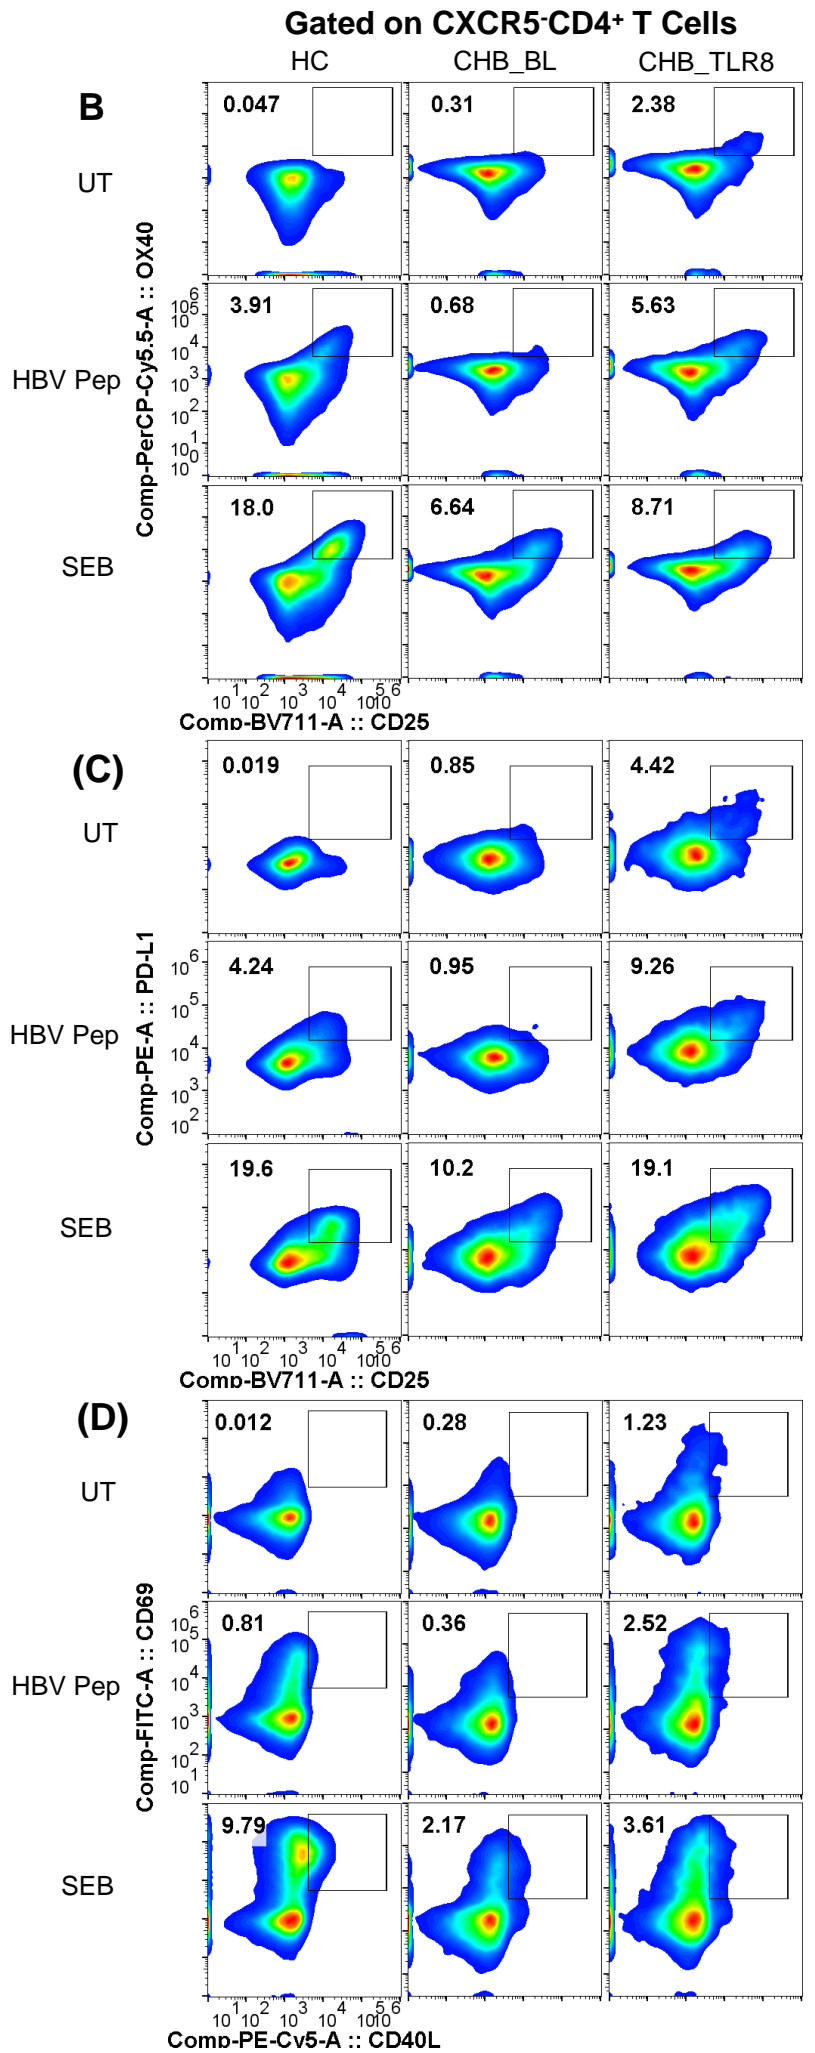

# Supplementary Figure 8

## A Gated on CXCR5+CD4+ cT<sub>FH</sub> Cells

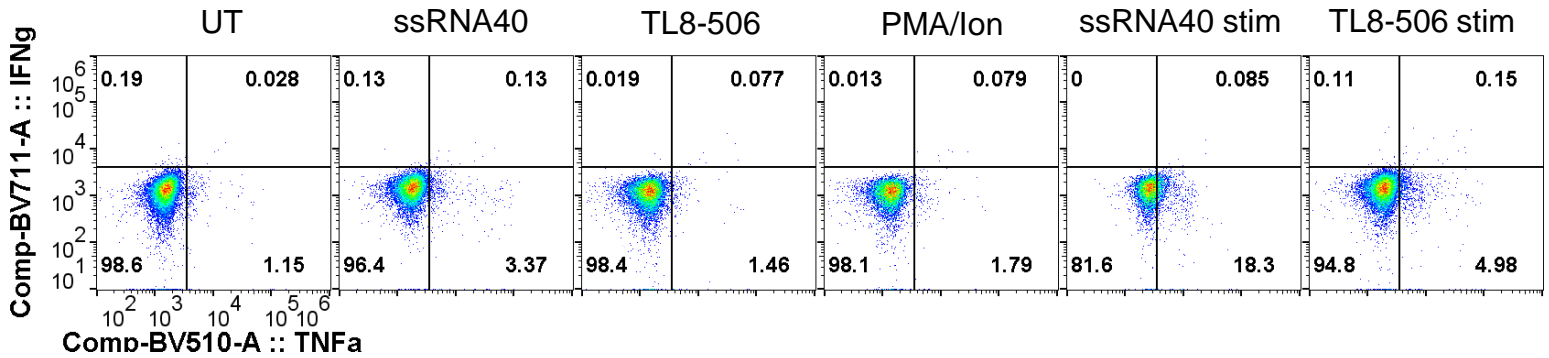

## B Gated on CXCR5+CD4+ cT<sub>FH</sub> Cells

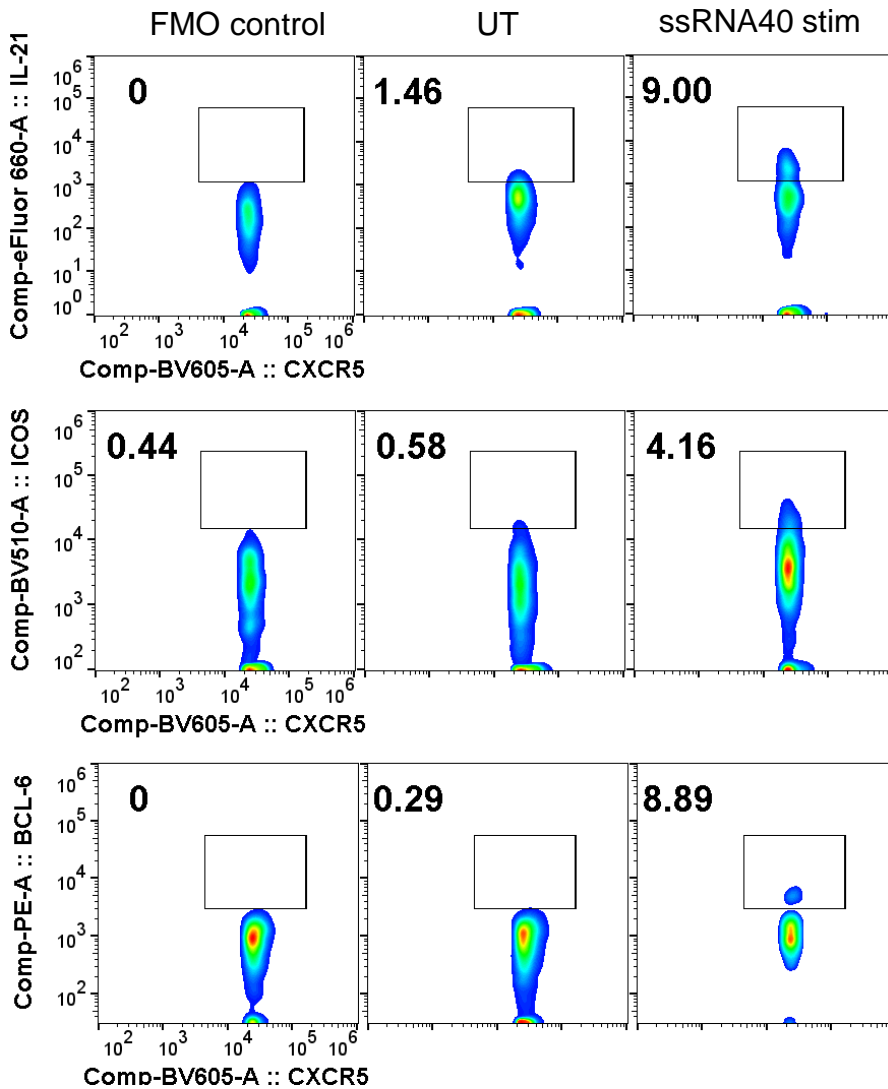

Supplement: DataSheet_1.pdf [file DataSheet_1.pdf]
